# Supplementary material
Source: MDPI journal article supplement (https://www.mdpi.com/2036-7481/14/2/39)

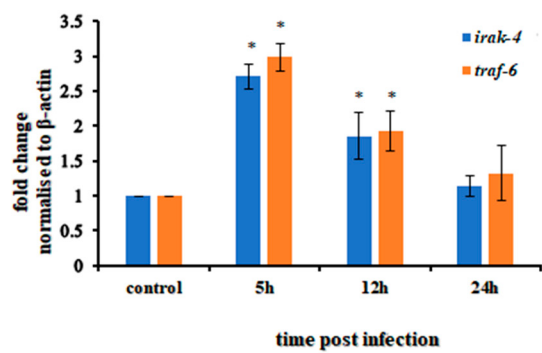

(A)

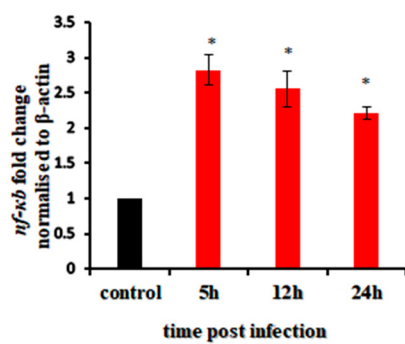

(B)

Figure S1. \*  $p < 0.01$

Supplement: s1 [file s1 › microbiolres-2162675-supplementary.pdf]
